# Supplementary material
Source: publisher figshare collection journal article supplement (https://aacr.figshare.com/articles/dataset/_/22363931)

# Supplementary Figure 1

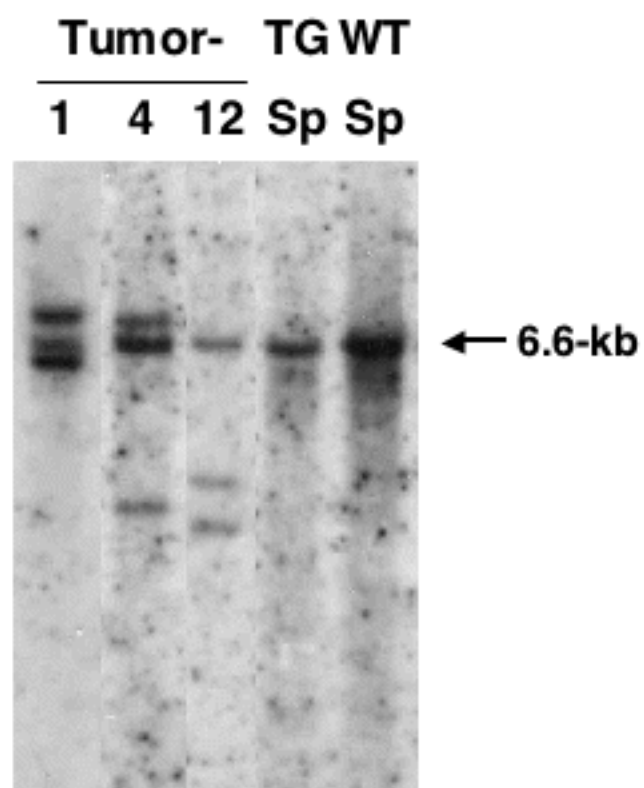

Supplement: Supplementary file 1 [file 39808154]
